# Otx-dependent expression of proneural bHLH genes establishes a neuronal bilateral asymmetry in *C. elegans*

Shunji Nakano<sup>1</sup>, Ronald E. Ellis<sup>2</sup> and H. Robert Horvitz<sup>1,\*</sup>

## SUMMARY

Bilateral asymmetry in *Caenorhabditis elegans* arises in part from cell lineages that differ on the left and right sides of the animal. The unpaired MI neuron descends from the right side of an otherwise left-right symmetric cell lineage that generates the MI neuron on the right and the e3D epithelial cell on the left. We isolated mutations in three genes that caused left-right symmetry in this normally asymmetric cell lineage by transforming MI into an e3D-like cell. These genes encode the proneural bHLH proteins NGN-1 and HLH-2 and the Otx homeodomain protein CEH-36. We identified the precise precursor cells in which *ceh-36* and *ngn-1* act, and showed that CEH-36 protein is asymmetrically expressed and is present in an MI progenitor cell on the right but not in its bilateral counterpart. This asymmetric CEH-36 expression promotes asymmetric *ngn-1* and *hlh-2* expression, which in turn induces asymmetric MI neurogenesis. Our results indicate that this left-right asymmetry is specified within the two sister cells that first separate the left and right branches of the cell lineage. We conclude that the components of an evolutionarily conserved Otx/bHLH pathway act sequentially through multiple rounds of cell division on the right to relay an initial apparently cryptic asymmetry to the presumptive post-mitotic MI neuron, thereby creating an anatomical bilateral asymmetry in the *C. elegans* nervous system.

**KEY WORDS:** Left-right asymmetry, *C. elegans*, Cell lineage

## INTRODUCTION

Left-right asymmetry is a widespread feature of animal anatomy. Studies over the past decade have advanced our understanding of mechanisms that establish left-right asymmetry in visceral organs of vertebrate embryos (for reviews, see Levin, 2005; Shiratori and Hamada, 2006). In addition to visceral organs, the nervous systems of both vertebrates and invertebrates display anatomical asymmetry (Concha and Wilson, 2001; Toga and Thompson, 2003), and in some cases such neuroanatomical asymmetries are important for nervous system function (Barth et al., 2005; Pascual et al., 2004). The identification of the molecular mechanisms by which neuroanatomical asymmetry is established is important to understand both neural development and neural function. Our current knowledge of the molecular and cellular mechanisms that specify anatomical asymmetry within the nervous system is limited.

The nervous system of *Caenorhabditis elegans* displays bilateral asymmetry (Hobert et al., 2002). Because the complete cell lineage of *C. elegans* has been described and the somatic cell lineage is essentially invariant from animal to animal (Kimble and Hirsh, 1979; Sulston and Horvitz, 1977; Sulston et al., 1983), the developmental origins of all cells, including all left-right paired and unpaired cells, are known. Much of the left-right symmetry arises from pairs of left-right analogous blastomeres, which through bilaterally symmetric cell lineages give rise to sets of left-right paired cells. Left-right asymmetry and threefold symmetry can be generated by disrupting the bilateral symmetry in such cell lineages.

The *C. elegans* pharynx contains single unpaired neurons as well as sets of cells arranged with threefold symmetry (Albertson and Thomson, 1976). For example, the MI motoneuron is a single unpaired neuron located in the pharynx. The MI cell body sends a single unilateral process circumferentially around the pharyngeal nerve ring. Numerous epithelial cells in the pharynx display threefold radial symmetry. For example, the three e3 epithelial cells are located on the ventral left (VL), ventral right (VR) and dorsal (D) regions of the pharynx. e3VL and e3VR are generated from a left-right symmetric cell lineage, whereas the e3D epithelial cell and the MI neuron are generated as lineally homologous descendants from a left-right asymmetric cell lineage. At the 50-cell stage of embryogenesis, the blastomere ABaraap divides and generates two multipotent daughter cells, ABaraapa and ABaraapp, which are a pair of left-right analogous blastomeres that give rise to six identical sets of left-right paired cells of diverse cell types, including the M2, M3 and NSM pharyngeal neurons, the m1 and m2 pharyngeal muscles, and the mc2 pharyngeal marginal cells (Fig. 1A; see Fig. S1 in the supplementary material for positions of these blastomeres). The anteriormost descendants of ABaraapa and ABaraapp differ in their cell fates: whereas ABaraapaaa differentiates into the e3D epithelial cell, its lineally homologous cell ABaraappaaa becomes the MI neuron. When this left-right asymmetry is specified and how information concerning the asymmetry is transduced to generate MI on the right and e3D on the left are unknown.

Here, we report that *ngn-1*, a bHLH neurogenin gene, *hlh-2*, the *C. elegans* ortholog of *E2A/Daughterless*, and *ceh-36*, a *C. elegans* homolog of the mammalian homeodomain gene Otx, are required for establishing left-right asymmetry in the ABaraap cell lineage. Loss-of-function mutations in these genes transform MI into an e3D-like cell, resulting in left-right symmetry in this normally asymmetric cell lineage. We show that *ceh-36* promotes expression of *ngn-1* and *hlh-2* and identify the precise precursor cells in which *ceh-36* and *ngn-1* act: the bilateral asymmetry is specified by the

<sup>1</sup>Howard Hughes Medical Institute and Department of Biology, Massachusetts Institute of Technology, Cambridge, MA 02139, USA. <sup>2</sup>Department of Molecular Biology, UMDNJ School of Osteopathic Medicine, Stratford, NJ 08084, USA.

\*Author for correspondence (horvitz@mit.edu)

asymmetric expression of *ceh-36* between ABaraapa and ABaraapp, the pair of left-right sister cells that generate the left and right branches of the cell lineage, respectively, and a CEH-36/NGN-1/HLH-2 transcriptional cascade acts through three rounds of cell division on the right side to generate MI and establish this aspect of neuronal bilateral asymmetry.

## MATERIALS AND METHODS

### *C. elegans* strains

*C. elegans* strains were cultured at 20°C as described previously (Brenner, 1974). N2 (Bristol) was the wild-type strain.

### Identification of MI and e3D cell fate reporters

The reporter *sams-5::gfp* is expressed in a single pharyngeal neuron of wild-type animals (The Genome BC *C. elegans* Gene Expression Consortium). We identified this cell as MI based on the morphology and position of its nucleus (Albertson and Thomson, 1976). The reporter *D2096.6::gfp* has previously been shown to be expressed in pharyngeal epithelial cells, pharyngeal muscle cells and pharyngeal marginal cells (Gaudet and Mango, 2002). We generated a variant, *D2096.6::pes-10::gfp*, that retains expression in the e3 pharyngeal epithelial cells, including e3D, but lacks expression in the pharyngeal muscle cells or pharyngeal marginal cells.

### Isolation of *ngn-1(n1921)*, *ngn-1(n5020)*, *ngn-1(n5052)* and *hlh-2(n5053)*

The wild-type strain was mutagenized with ethyl methanesulfonate (EMS) and F2 progeny were observed using Nomarski optics (Brenner, 1974). *ngn-1(n5020)*, *ngn-1(n5052)* and *hlh-2(n5053)/+* were isolated from screens looking for animals in which MI was missing and an extra e3D-like cell was present. *ngn-1(n1921)* was recovered from screens looking for animals in which one or more extra neuronal cells were present in the anterior pharynx. The extra neuronal cells in the anterior pharynx of *ngn-1(n1921)* mutants result from a dislocation of the M2 neurons, which are normally located in the posterior pharynx (R.E.E. and H.R.H., unpublished).

### Isolation of *ceh-36(n5333)*, *ceh-36(n5339)* and *ceh-36(n5340)*

Wild-type animals carrying the *D2096.6::pes-10::gfp* reporter were mutagenized with EMS and F3 progeny were observed using a fluorescence-equipped dissecting microscope. *ceh-36(n5333)*, *ceh-36(n5339)* and *ceh-36(n5340)* were isolated as animals that contained an extra cell expressing *D2096.6::pes-10::gfp*.

### Isolation of *hlh-2(n5287Δ)*

Genomic DNA pools from EMS-mutagenized animals were screened by PCR for deletion alleles of *hlh-2*, essentially as described (Jansen et al., 1997; Liu et al., 1999). *hlh-2(n5287Δ)* was isolated from a frozen stock and backcrossed to the wild type four times. The *hlh-2(n5287Δ)* allele removes sequence between nucleotide 18388 of cosmid M05B5 and nucleotide 2042 of cosmid C01H6 and inserts the 15 bp sequence GAGCAATGGCGGCAG at that site.

### RNA interference (RNAi)

We performed RNAi of *ngn-1* or *hlh-2* by growing *eri-1(mg366)* or wild-type animals, respectively, on HT115(DE3) *E. coli* harboring a *ngn-1* RNAi construct or a *hlh-2* RNAi construct, respectively. The presence or absence of MI in the progeny of the animals grown on these bacteria was determined using Nomarski optics.

### Cell ablation

Wild-type or *ngn-1(n1921)* mutant embryos carrying the *D2096.6::pes-10::gfp* reporter were directly observed from the 28-cell stage. Laser microsurgery of ABaraappa was performed as described (Avery and Horvitz, 1987). The operated embryos were recovered and grown at 20°C. After hatching, the number of e3D-like cells was determined using the *D2096.6::pes-10::gfp* reporter.

### Mosaic analyses

We observed animals of genotype *ngn-1(n1921); nEx1638[ngn-1(+), sur-5::gfp, unc-119::gfp]* and of genotype *ceh-36(n5333) lin-15AB(n765); nEx1703[ceh-36(+), sur-5::gfp, unc-119::gfp, lin-15AB(+)]* using

Nomarski optics equipped with epifluorescence. Fisher's tests were used for statistical analyses of the association between the fate specification of MI and the presence of the array in ABaraappaaa. To determine the cell division at which the array was lost in the Class IV animals, we determined the presence or absence of the array as judged by GFP fluorescence in the following cells: e1D, e1VL, e1VR, e2VR, e3D, e3VR, I2R, I5, M2L, M2R, M3L, M3R, mc2DL, mc2DR, MCR, NSML and NSMR. Based on the cell lineages that give rise to these cells (Sulston et al., 1983), we determined the cell division at which the array was lost.

### Expression analyses of *ngn-1::gfp*, *hlh-2::gfp* and *ceh-36::gfp*

Gravid hermaphrodites carrying the *ngn-1::gfp*, *hlh-2::gfp* and *ceh-36::gfp* reporters were dissected to obtain early-stage embryos. The cell divisions of these embryos were directly observed using Nomarski optics and epifluorescence.

### Plasmid constructions and germline transformation experiments

A description of the plasmid constructs and concentrations used is available from the authors. Germline transformation experiments were performed as described (Mello et al., 1991).

### Physical interaction between His-NGN-1 and HLH-2

We purified His-NGN-1 proteins and HLH-2 proteins from *E. coli*. His-NGN-1 (1 μM) was mixed with HLH-2 protein or MBP (maltose-binding protein) (1 μM) in the presence of Ni-NTA agarose (Qiagen), and the protein mixtures were washed three times. We eluted proteins bound to the Ni-NTA with 200 mM imidazole solution and assessed the amount of HLH-2 or MBP proteins in the eluates by western blot analysis using anti-HLH-2 antibody (provided by Michael Krause) or anti-MBP antibody (New England BioLabs).

## RESULTS

### *ngn-1* and *hlh-2* mutants lack the MI neuron and contain an extra e3D-like epithelial cell

To identify genes required for establishing left-right asymmetry in the cell lineage that gives rise to MI on the right and e3D on the left (Fig. 1A), we performed genetic screens for mutations that generate left-right symmetry in this normally asymmetric cell lineage. Such mutants might lack MI and contain an extra e3D-like cell, or alternatively lack e3D and contain an extra MI-like neuron. MI and e3D can be identified using Nomarski optics based on their sizes, morphologies and the positions of their nuclei (Fig. 2A). We performed screens using Nomarski optics and recovered four mutations (*n1921*, *n5020*, *n5052* and *n5053*) that cause the apparent absence of MI and presence of an extra e3D-like cell (Fig. 2B,C). As described below, *n1921*, *n5020* and *n5052* confer recessive phenotypes, fail to complement, and are alleles of the gene *ngn-1*. *n5053* is an allele of the gene *hlh-2* (see below) and semi-dominantly causes the absence of MI and the presence of an extra e3D-like cell. Strains homozygous for the *n5053* mutation displayed embryonic lethality.

*ngn-1* and *hlh-2* mutants lack a neuronal nucleus in the region of the pharynx where MI is normally located in wild-type animals. To confirm that the missing neuron in these mutants is MI, we tested whether these mutant animals express a *gfp* cell-fate reporter that is normally expressed in MI in wild-type animals. The reporter *sams-5::gfp* was expressed in MI of wild-type animals (Table 1A; Fig. 2E). We introduced *sams-5::gfp* into *ngn-1* and *hlh-2* mutants and found that *sams-5::gfp* was not expressed in these mutants (Table 1A; Fig. 2F,G), indicating that MI is absent in these mutants.

*ngn-1* and *hlh-2* mutants contain an extra nucleus that resembles that of e3D (Fig. 2B,C). To determine whether this extra cell adopts the e3D fate, we tested whether these extra cells express a *gfp* cell-fate marker that is expressed in e3D of wild-type animals. The

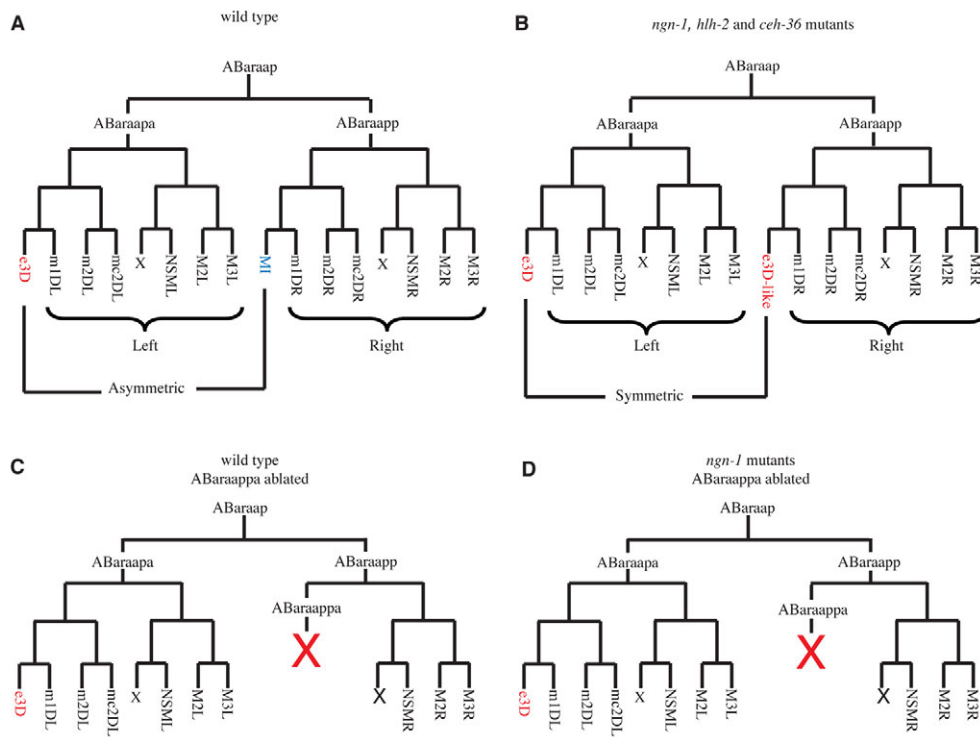

**Fig. 1. The MI neuron is generated from a left-right asymmetric cell lineage.** (A) In the wild type, left-right asymmetry in the ABaraap cell lineage is seen in the different cell fates of the MI neuron and the e3D epithelial cell. (B) In *ngn-1, hlh-2* and *ceh-36* mutants, left-right asymmetry in the cell lineage is lost as a result of the cell-fate transformation of the presumptive MI neuron into an e3D-like cell. (C,D) The predicted ABaraap cell lineages of (C) the wild type and (D) *ngn-1(n1921)* mutants after laser ablation of the grandmother cell of the MI neuron, ABaraappa. X in red indicates the cell killing of ABaraappa by laser microsurgery.

reporter *D2096.6::pes-10::gfp* was expressed in the e3 epithelial cells, including e3D, of wild-type animals (Fig. 2I; Table 1B). We introduced *D2096.6::pes-10::gfp* into *ngn-1* and *hlh-2* mutants and found that *D2096.6::pes-10::gfp* was also expressed in the extra cell with a nucleus morphologically similar to that of e3D (Fig. 2J,K; Table 1B), indicating that these mutants generate an extra e3D-like cell.

### ***ngn-1* and *hlh-2* mutations generate symmetry in a normally left-right asymmetric cell lineage**

Using Nomarski optics, we found that the absence of MI and the presence of an extra e3D-like cell in *ngn-1* and *hlh-2* mutants were perfectly correlated: when MI was absent, the extra e3D-like cell was always present; when MI was present, the extra e3D-like cell was always absent ( $n=600$ , data not shown). We observed no animals that contained or lacked both MI and the extra e3D-like cell, suggesting that these mutations transform MI into an e3D-like cell, thereby generating symmetry in a normally left-right asymmetric cell lineage (Fig. 1B).

We performed laser microsurgery to determine whether the extra e3D-like cell in *ngn-1(n1921)* mutants is generated from the cell lineage that normally gives rise to MI. If ABaraappaaa, which normally becomes MI in wild-type animals, instead becomes an e3D-like cell in *ngn-1* mutants, then elimination of a precursor cell of ABaraappaaa from *ngn-1(n1921)* mutant embryos by laser ablation should result in the absence of the extra e3D-like cell (Fig. 1C,D). We observed developing *ngn-1(n1921)* embryos and identified ABaraappa, the grandmother cell of the presumptive MI neuron. Elimination of ABaraappa by laser ablation prevented the generation of the extra e3D-like cell in *ngn-1(n1921)* animals (Table 1C). By contrast, elimination of the MI grandmother cell in wild-type embryos did not change the number of the e3D cells compared with that in unoperated wild-type embryos (Fig. 1C; Table 1C). We concluded that the extra e3D-like cell in *ngn-*

*1(n1921)* mutants is generated from the cell lineage that normally gives rise to MI and that MI is transformed into an e3D-like cell in *ngn-1* and *hlh-2* mutants, resulting in the loss of left-right asymmetry in the cell lineage (Fig. 1B).

### ***ngn-1* encodes a bHLH protein of the Neurogenin subfamily**

We mapped *n1921* to a 153 kb region of LG IV that includes the *ngn-1* locus. We generated a 15.1 kb *ngn-1* genomic clone that contains 12.4 kb 5' upstream and 1.5 kb 3' downstream sequence of the predicted *ngn-1*-coding region and found that this *ngn-1* clone rescued the MI transformation of *n1921* (see Table S1A in the supplementary material). We also observed that *ngn-1*(RNAi) caused MI transformation (see Table S2 in the supplementary material).

*ngn-1* is predicted to encode a 184 amino acid protein similar to members of the neurogenin bHLH subfamily (see Fig. S2 in the supplementary material). We determined the DNA sequence of *ngn-1* in our mutants and identified a mutation in each case (Fig. 3A, see Fig. S3 for details concerning the mutation found in *n5052*). We also characterized an *ngn-1* deletion allele, *ngn-1(ok2200Δ)*, which lacks the second and third exons of *ngn-1*, thus likely defining a null allele of *ngn-1* (Fig. 3A). *ngn-1(ok2200Δ)* mutants exhibited MI transformation (Table 1A,B).

These findings demonstrate that *ngn-1* is required to establish bilateral asymmetry in this cell lineage.

### ***n5053* is an allele of *hlh-2*, the *C. elegans* ortholog of *E2A/Daughterless***

We mapped *n5053* to a 2 map-unit interval of LG I between *dpy-5* and *unc-13*. This genomic region contains the gene *hlh-2*, the *C. elegans* ortholog of *E2A/Daughterless* (Krause et al., 1997). Because *E2A* (*Tcf3* – Mouse Genome Informatics) in mammals and *Daughterless* in *Drosophila* encode bHLH proteins that form heterodimers with other bHLH proteins, including mammalian

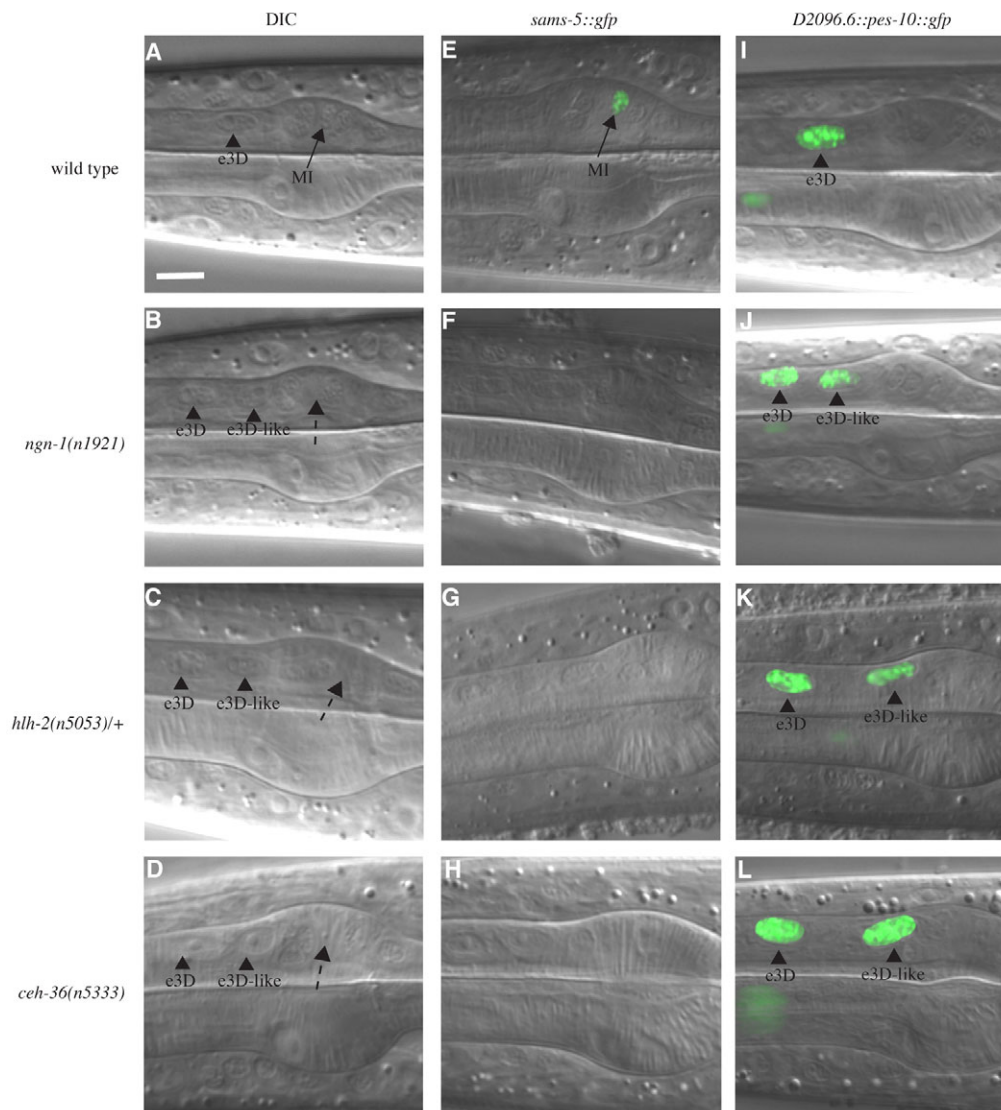

**Fig. 2. *ngn-1(n1921)*, *hlh-2(n5053)* and *ceh-36(n5333)* transform the MI neuron into an e3D-like epithelial cell.**

(A) Nomarski image of a region of the anterior wild-type pharynx. The wild-type pharynx contains MI (arrow) and e3D (arrowhead). The nucleus of the MI neuron is small and granular, whereas that of the e3D epithelial cell is larger, oval in shape and has a distinct nucleolus. (B–D) Nomarski image of a region of anterior (B) *ngn-1(n1921)*, (C) *hlh-2(n5053)* and (D) *ceh-36(n5333)* pharynges. The pharynx in these mutants lacks MI (dotted arrow) and contains two e3D-like cells (arrowheads). (E) *sams-5::gfp* reporter expression in the wild type. The *sams-5::gfp* reporter is expressed in MI (arrow). (F–H) *sams-5::gfp* reporter expression in (F) *ngn-1(n1921)*, (G) *hlh-2(n5053)* and (H) *ceh-36(n5333)* mutants. The *sams-5::gfp* reporter failed to be expressed in the pharynx of these mutants. (I) *D2096.6::pes-10::gfp* reporter expression in the wild type. The *D2096.6::pes-10::gfp* reporter was expressed in e3D (arrowhead). (J–L) *D2096.6::pes-10::gfp* reporter expression in (J) *ngn-1(n1921)*, (K) *hlh-2(n5053)* and (L) *ceh-36(n5333)* mutants. The *D2096.6::pes-10::gfp* reporter was expressed in e3D and the extra e3D-like cell (arrowheads). Scale bar: 5  $\mu$ m.

Neurod1 (Longo et al., 2008; Poulin et al., 1997) and *Drosophila Atonal* (Jarman et al., 1993), respectively, both of which are closely related to the neurogenin subfamily, we examined whether *n5053* is an allele of *hlh-2*. *n5053* mutants carry a G-to-A transition mutation that alters the splice acceptor sequence preceding the second exon of *hlh-2* (Fig. 3B). We generated an *hlh-2* genomic clone that contains 12.2 kb 5' upstream and 5.2 kb 3' downstream region of the *hlh-2* coding sequence and found that *n5053* mutants transformed with this *hlh-2* clone were rescued for the MI transformation as well as the embryonic lethality (see Table S1B,C in the supplementary material). In addition, RNAi treatment of *hlh-2* caused MI transformation (see Table S2 in the supplementary material). Furthermore, we isolated an *hlh-2* deletion allele, *hlh-2(n5287Δ)*, that removes the entire coding sequence except for the first exon, thus presumably defining a null allele of *hlh-2* (Fig. 3B; see Fig. S4 in the supplementary material for details concerning this mutation). In animals heterozygous for *hlh-2(n5287Δ)*, MI was transformed into an e3D-like cell (Table 1A,B), and animals homozygous for *hlh-2(n5287Δ)* displayed embryonic lethality. These results indicate that *hlh-2* is a haplo-insufficient locus required for establishing bilateral asymmetry in this cell lineage.

A physical interaction between NGN-1 and HLH-2 has been shown previously using yeast two-hybrid studies (Grove et al., 2009). We examined whether NGN-1 and HLH-2 directly interact using an in vitro pull-down assay with purified proteins and found that His-tagged NGN-1 proteins associated with HLH-2 proteins but not with a control protein, MBP (Fig. 3C). These results suggest that NGN-1 and HLH-2 form a transcriptional heterodimer required to establish bilateral asymmetry in this cell lineage.

Previous studies indicated that HLH-2 is involved in LIN-12/Notch-mediated lateral signaling in *C. elegans* (Karp and Greenwald, 2003). We therefore asked whether mutations in genes encoding components of LIN-12/Notch signaling pathways, *lin-12* and *glp-1* (Austin and Kimble, 1989; Yochem et al., 1988), affect the MI-e3D bilateral asymmetry. We observed that in *lin-12* and *glp-1* mutants, both MI and e3D were normally present (see Table S3 in the supplementary material).

### ***ngn-1* acts cell autonomously to establish a left-right asymmetry**

To identify when and where *ngn-1* functions to generate MI, we performed mosaic analysis of *ngn-1*. Specifically, we generated *ngn-1(n1921)* mutant animals carrying an extrachromosomal array

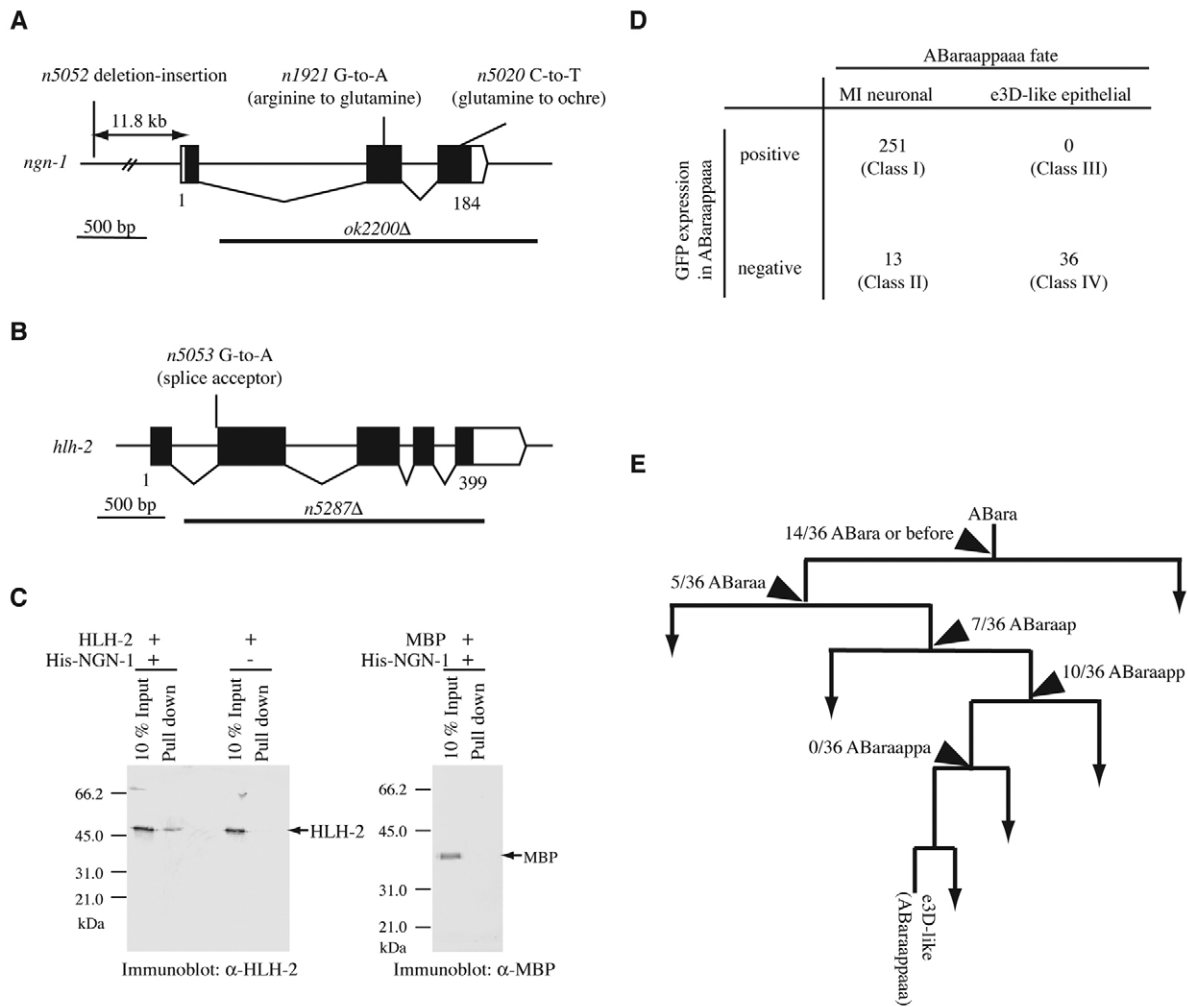

**Fig. 3. NGN-1 binds to HLH-2 and acts cell-autonomously.** (A,B) Gene structures of (A) *ngn-1* and (B) *hlh-2*, and mutations associated with each mutant are shown. The black boxes indicate exons; white boxes indicate untranslated regions. (C) In vitro pull-down experiments between hexa-histidine-tagged NGN-1 (His-NGN-1) and HLH-2. Proteins included in each reaction are indicated. The amounts of HLH-2 protein (left panel) and MBP protein (right panel) in the initial reaction mixture (10% input) and in the bound fraction (pull down) were determined by western blot analyses. The numbers indicate the positions of molecular weight markers. (D) Mosaic analysis of *ngn-1*. Mosaic animals were grouped into four classes based on cell fates and the presence of the extrachromosomal array in ABaraappaaa (see text). The number of mosaic animals in each class is indicated. (E) Determination of the site of the extrachromosomal array loss in each of the 36 Class IV animals. A region of the cell lineage showing the origin of ABaraappaaa is shown. The numbers represent the fraction of Class IV animals in which the extrachromosomal array was lost at the corresponding cell division.

containing the *ngn-1* rescuing construct marked with the cell-autonomous *gfp* markers *sur-5::gfp* (Yochem et al., 1998) and *unc-119::gfp* (Maduro and Pilgrim, 1995). Extrachromosomal arrays in *C. elegans* are mitotically unstable, resulting in the generation of clones of cells that lose the arrays. We examined *ngn-1(n1921)* animals carrying the array using Nomarski optics equipped with epifluorescence and examined ABaraappaaa, which normally becomes MI in wild-type animals to determine: (1) the fate of ABaraappaaa, i.e. an MI neuronal fate or an e3D-like epithelial fate, judged by the size and the morphology of its nucleus; and (2) the presence or the absence of the array in the ABaraappaaa cell, judged by GFP fluorescence. Based on these two criteria, each animal was classified into one of four categories: Class I animals, ABaraappaaa differentiated into an MI neuron that retained the array; Class II animals, ABaraappaaa differentiated into an MI neuron that lacked the array; Class III animals, ABaraappaaa was transformed into an

e3D-like cell that retained the array; and Class IV animals, ABaraappaaa was transformed into an e3D-like cell that lacked the array (Fig. 3D). If *ngn-1* acts cell autonomously, then ABaraappaaa transformed into an e3D-like cell should not retain the array, resulting in the absence of the Class III animals. Of 300 animals examined, 36 animals contained ABaraappaaa transformed into an e3D-like cell. All of these 36 animals were classified as Class IV, in which ABaraappaaa did not retain the array; no animals were categorized as Class III (Fig. 3D). The remaining 264 animals contained an ABaraappaaa that differentiated into an MI neuron. Of these animals, 251 animals were classified as Class I, in which ABaraappaaa retained the array, which is consistent with the cell-autonomous action of *ngn-1*. The remaining 13 animals were categorized as Class II, in which ABaraappaaa differentiated as normal into an MI neuron despite the absence of the array. These 13 Class II animals presumably at least in part reflect the incomplete

**Table 1. *ngn-1*, *hlh-2* and *ceh-36* mutations cause symmetry in a normally asymmetric cell lineage**

| (A) <i>ngn-1</i> , <i>hlh-2</i> and <i>ceh-36</i> mutants fail to generate the MI neuron |                                   |          |
|------------------------------------------------------------------------------------------|-----------------------------------|----------|
| Genotype                                                                                 | % animals missing MI <sup>‡</sup> | <i>n</i> |
| Wild type                                                                                | 0                                 | 50       |
| <i>ngn-1(n1921)</i>                                                                      | 98                                | 100      |
| <i>ngn-1(n5020)</i>                                                                      | 97                                | 100      |
| <i>ngn-1(n5052)</i>                                                                      | 62                                | 100      |
| <i>ngn-1(ok2200Δ)</i>                                                                    | 99                                | 100      |
| <i>hlh-2(n5053)/+*</i>                                                                   | 30                                | 100      |
| <i>hlh-2(n5287Δ)/+*</i>                                                                  | 32                                | 100      |
| <i>ceh-36(n5333)</i>                                                                     | 94                                | 100      |
| <i>ceh-36(n5339)</i>                                                                     | 42 <sup>§</sup>                   | 100      |
| <i>ceh-36(n5340)</i>                                                                     | 91 <sup>§</sup>                   | 100      |
| <i>ceh-36(ok795Δ)<sup>†</sup></i>                                                        | 93                                | 82       |

| (B) <i>ngn-1</i> , <i>hlh-2</i> and <i>ceh-36</i> mutants generate an extra e3D-like epithelial cell |                                                       |                    |          |
|------------------------------------------------------------------------------------------------------|-------------------------------------------------------|--------------------|----------|
| Genotype                                                                                             | % animals with one or two e3D-like cells <sup>¶</sup> |                    | <i>n</i> |
|                                                                                                      | One e3D-like cell                                     | Two e3D-like cells |          |
| Wild type                                                                                            | 100                                                   | 0                  | 50       |
| <i>ngn-1(n1921)</i>                                                                                  | 5                                                     | 95                 | 100      |
| <i>ngn-1(n5020)</i>                                                                                  | 9                                                     | 91                 | 100      |
| <i>ngn-1(n5052)</i>                                                                                  | 42                                                    | 58                 | 100      |
| <i>ngn-1(ok2200Δ)</i>                                                                                | 2                                                     | 98                 | 100      |
| <i>hlh-2(n5053)/+*</i>                                                                               | 87                                                    | 13                 | 100      |
| <i>hlh-2(n5287Δ)/+*</i>                                                                              | 85                                                    | 15                 | 100      |
| <i>ceh-36(n5333)</i>                                                                                 | 3                                                     | 97                 | 100      |
| <i>ceh-36(n5339)</i>                                                                                 | 51                                                    | 49                 | 100      |
| <i>ceh-36(n5340)</i>                                                                                 | 5                                                     | 95                 | 100      |
| <i>ceh-36(ok795Δ)<sup>†</sup></i>                                                                    | 4                                                     | 96                 | 98       |

| (C) Ablation of the MI grandmother prevents the generation of the extra e3D-like epithelial cell |                                                       |                   |                    |          |
|--------------------------------------------------------------------------------------------------|-------------------------------------------------------|-------------------|--------------------|----------|
| Genotype                                                                                         | % animals with one or two e3D-like cells <sup>¶</sup> |                   |                    | <i>n</i> |
|                                                                                                  | Cell ablated                                          | One e3D-like cell | Two e3D-like cells |          |
| Wild type                                                                                        | None                                                  | 100               | 0                  | 50       |
| <i>ngn-1(n1921)</i>                                                                              | None                                                  | 4                 | 96                 | 50       |
| Wild type                                                                                        | ABaraappa                                             | 100               | 0                  | 3        |
| <i>ngn-1(n1921)</i>                                                                              | ABaraappa                                             | 100               | 0                  | 5        |

\*To score *hlh-2(n5053)/+* and *hlh-2(n5287Δ)/+* animals, we allowed hermaphrodites of genotype *dpy-5(e61) + unc-13(e51)/+ hlh-2+* to self-fertilize and examined their non-Dpy non-Unc progeny.

<sup>†</sup>To score *ceh-36(ok795Δ)* animals, we allowed hermaphrodites of genotype *ceh-36(ok795Δ)/+* to self-fertilize and examined progeny that arrested development at the first larval stage.

<sup>‡</sup>The absence of the MI neuron was determined using an MI cell-fate marker, *sams-5::gfp*. All strains were homozygous for the *sams-5::gfp* reporter *nls396*. The populations of animals of each genotype examined in (A) were different from those examined in (B).

<sup>§</sup>The absence of the MI neuron in these animals was determined using Nomarski microscopy.

<sup>¶</sup>The number of the e3D-like epithelial cells was determined using an e3D cell-fate marker, *D2096.6::pes-10::gfp*. All strains except for *ceh-36(ok795Δ)* were homozygous for the *D2096.6::pes-10::gfp* reporter *nls363*. The number of the e3D-like epithelial cells in *ceh-36(ok795Δ)* mutants was determined using the *D2096.6::pes-10::gfp* reporter *nls362*.

penetrance of the *ngn-1(n1921)* mutation (Table 1A,B). In short, our data support a strong association between the specification of the MI neuron fate and the presence of the array in ABaraappaaa ( $P < 0.001$ ) and indicate that *ngn-1* acts cell-autonomously to generate bilateral asymmetry in the cell lineage.

We further examined the 36 animals of Class IV, in which ABaraappaaa was transformed into an e3D-like cell that had lost the array. We determined the cell division at which the array had been mitotically lost by scoring the presence or absence of the array in cells

that shared a precursor cell with ABaraappaaa at some point of their lineage history. We identified 10 animals that had an extra e3D-like cell and had lost the array at the cell division of ABaraapp (Fig. 3E). This observation indicates that the presence of a functional *ngn-1* gene in ABaraapp is insufficient to generate an MI neuron and thus that to generate MI a functional *ngn-1* gene is necessary at or later than the stage of ABaraapp, the MI grandmother cell. By contrast, we identified no animals that had lost the array at the next cell division, that of the MI grandmother cell, ABaraapp (Fig. 3E). This result suggests that in all animals in which the array was present in the MI grandmother cell, ABaraappaaa differentiated as normal into an MI neuron whether the array was (Class I animals) or was not (Class II animals) transmitted to the presumptive MI neuron. Thus, the presence of the array in the MI grandmother cell was sufficient to rescue the MI transformation of *ngn-1(n1921)* mutants. Together, these findings indicate that the presence of the *ngn-1* wild-type gene in the MI grandmother cell is both necessary and sufficient to generate an MI neuron and establish left-right asymmetry in the cell lineage.

### Expression of *ngn-1* and *hlh-2* is left-right asymmetric

To identify when and where *ngn-1* is expressed during embryogenesis, we generated a translational *ngn-1::gfp* fusion gene by an in-frame insertion of a *gfp*-coding sequence into the 3' end of the *ngn-1*-coding sequence flanked by the 12.4 kb 5' upstream and 1.5 kb 3' downstream genomic sequence. We integrated this *ngn-1::gfp* transgene into the *C. elegans* genome and found that the *ngn-1::gfp* transgene rescued the MI transformation of *ngn-1(n1921)* mutants (see Table S1A in the supplementary material), indicating that this *ngn-1::gfp* is functional. Because mosaic analysis of *ngn-1* suggested the cell-autonomous action of *ngn-1*, we asked whether *ngn-1* is expressed in the cell lineage that gives rise to MI. We observed developing embryos carrying *ngn-1::gfp* and found that NGN-1::GFP protein was present in the MI mother cell (Fig. 4A-C). By contrast, NGN-1::GFP was not detectable in the e3D mother cell (Fig. 4A-C), indicating that expression of *ngn-1* is left-right asymmetric within this asymmetric cell lineage.

Immunostaining experiments using an HLH-2 antibody had demonstrated previously that HLH-2 is present in all cells up to the 100- to 200-cell stage of embryonic development (Krause et al., 1997). To test specifically whether *hlh-2* is expressed in the MI mother cell, we generated a translational *hlh-2::gfp* fusion gene by an in-frame insertion of a *gfp*-coding sequence to the 3' end of the *hlh-2*-coding sequence flanked by the 18.7 kb 5' upstream and 10.6 kb 3' downstream genomic sequence. We integrated this *hlh-2::gfp* transgene into the *C. elegans* genome and found that *hlh-2::gfp* rescued the MI transformation as well as the embryonic lethality of *hlh-2(n5053)* mutants (see Table S1B,C in the supplementary material), indicating that *hlh-2::gfp* is functional. We observed developing embryos carrying *hlh-2::gfp* and found that HLH-2::GFP was localized asymmetrically: HLH-2::GFP was detectable in the MI mother cell but not in the e3D mother cell (Fig. 4G-I). These results indicate that both *ngn-1* and *hlh-2* are expressed asymmetrically, and suggest that this left-right asymmetric expression of *ngn-1* and *hlh-2* establishes bilateral asymmetry in the cell lineage.

### *ceh-36*, an Otx/Otd homeodomain gene, is required for establishing the MI-e3D bilateral asymmetry

To identify factors that regulate the asymmetric expression of *ngn-1* and *hlh-2*, we performed additional genetic screens for mutations that cause left-right symmetry in this normally

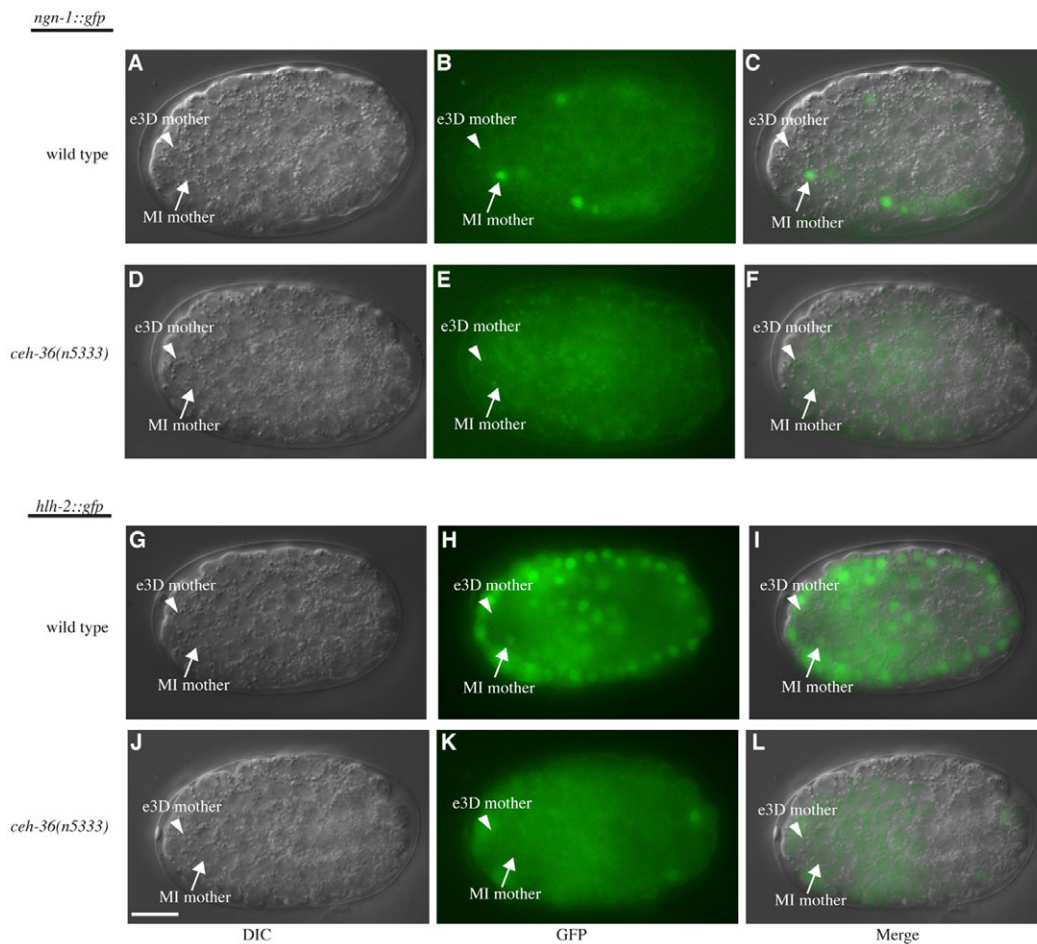

**Fig. 4. Expression of *ngn-1* and *hlh-2* is left-right asymmetric.** (A) Nomarski image of a wild-type embryo carrying *ngn-1::gfp*. (B) Fluorescence image of the same embryo. (C) Merged image of A and B. (D) Nomarski image of a *ceh-36(n5333)* mutant embryo carrying *ngn-1::gfp*. (E) Fluorescence image of the same embryo. (F) Merged image of D and E. (G) Nomarski image of a wild-type embryo carrying *hlh-2::gfp*. (H) Fluorescence image of the same embryo. (I) Merged image of G and H. (J) Nomarski image of a *ceh-36(n5333)* embryo carrying *hlh-2::gfp*. (K) Fluorescence image of the same embryo. (L) Merged image of J and K. The arrows indicate the MI mother cell, ABaraapaa; the arrowheads indicate the e3D mother cell, ABaraapaa. Anterior is towards the left; ventral is towards the top. Scale bar: 5  $\mu$ m.

asymmetric cell lineage. We mutagenized wild-type animals carrying the e3D cell-fate reporter, *D2096.6::pes-10::gfp*, and screened for mutants in which an extra e3D-like cell was present or e3D was absent (R.E.E. and H.R.H., unpublished). Among the isolates we recovered were three allelic mutations (*n5333*, *n5339* and *n5340*) that caused the presence of an extra e3D-like cell (Table 1B; Fig. 2L). We introduced the MI cell-fate reporter *sams-5::gfp* into these mutants and observed that these mutants failed to generate MI (Table 1A; Fig. 2H), indicating that these mutations transform MI into an e3D-like cell (Fig. 1B).

We mapped *n5333* to a 100 kb region of LG X that includes the gene *ceh-36*. We generated a 5.7 kb *ceh-36* genomic clone that contains 2.5 kb 5' upstream and 1.1 kb 3' downstream sequence of the *ceh-36*-coding region and found that this *ceh-36* clone rescued the MI transformation of *n5333* (see Table S4 in the supplementary material). *ceh-36* encodes a 257 amino acid protein similar to members of the Otx/Otd homeodomain subfamily (Chang et al., 2003; Koga and Ohshima, 2004; Lanjuin et al., 2003). We determined the DNA sequence of *ceh-36* in our mutants and identified a mutation in each case (Fig. 5A). We also characterized a *ceh-36* deletion allele, *ceh-*

*36(ok795 $\Delta$ )*, which lacks the entire coding sequence of *ceh-36* except for the first exon, thus likely defining a null allele of *ceh-36* (Fig. 5A). We observed that *ceh-36(ok795 $\Delta$ )* mutants displayed larval lethality and exhibited MI transformation (Table 1A,B). These findings establish that *ceh-36* is required for establishing asymmetry in this cell lineage.

#### Establishment of the MI-e3D asymmetry does not require genes that specify non-anatomical neuronal bilateral asymmetries

Some aspects of left-right asymmetry in the *C. elegans* nervous system are not apparent anatomically: left-right pairs of the ASE gustatory neurons and the AWC olfactory neurons are each morphologically similar but distinct both functionally (Pierce-Shimomura et al., 2001; Wes and Bargmann, 2001) and in their patterns of gene expression (Ortiz et al., 2006; Troemel et al., 1999; Yu et al., 1997).

We tested whether genes that specify the asymmetry of the ASE neurons and the AWC neurons are required to establish the MI-e3D bilateral asymmetry. We observed that in *cog-1*, *lim-6*, *lin-49* and *lxy-6* mutants, in which the asymmetry of the ASE neurons is lost

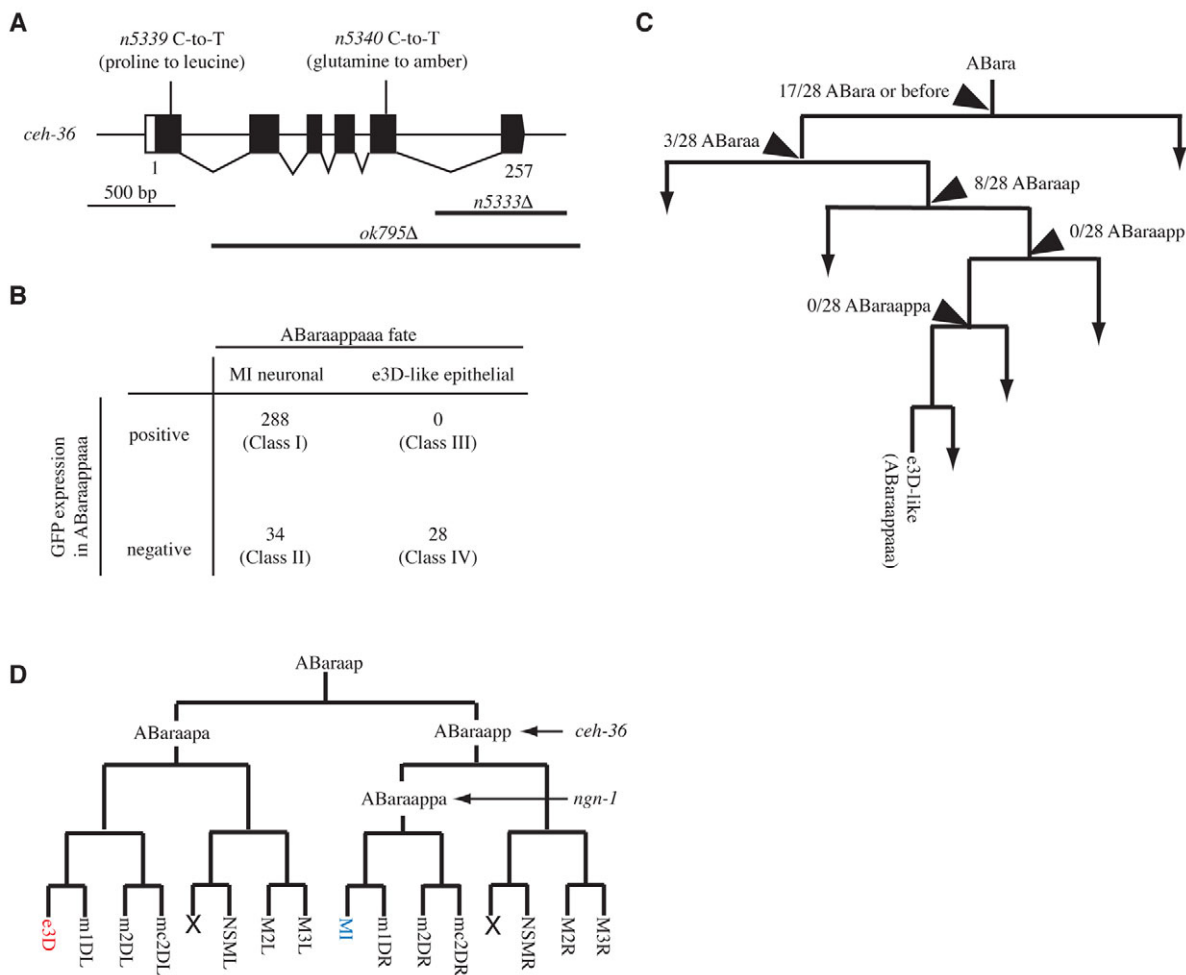

**Fig. 5. *ceH-36* acts cell-autonomously to establish a bilateral asymmetry.** (A) Gene structure of *ceH-36* and mutations associated with each mutant are shown. The black boxes indicate exons; white boxes indicate untranslated regions. (B) Mosaic analysis of *ceH-36*. Mosaic animals were grouped into four classes based on cell fates and the presence of the extrachromosomal array in ABaraappaaa (see text). The number of mosaic animals in each class is indicated. (C) Determination of the site of the extrachromosomal array loss in each of the 28 Class IV animals. A region of the cell lineage showing the origin of ABaraappaaa is shown. The numbers represent the fraction of the Class IV animals in which the extrachromosomal array was lost at the corresponding cell division. (D) Cell lineage diagram indicates the sites of actions of *ceH-36* and *ngn-1*. The wild-type *ceH-36* gene in the MI great grandmother cell (ABaraapp) is necessary and sufficient to rescue the MI transformation of *ceH-36(n5333)* mutants. The wild-type *ngn-1* gene in the MI grandmother cell (ABaraappaa) is necessary and sufficient to rescue the MI transformation of *ngn-1(n1921)* mutants.

(Chang et al., 2003; Johnston and Hobert, 2003), and in *inx-19*, *nsy-4* and *unc-43* mutants, in which the asymmetry of the AWC neurons is lost (Chuang et al., 2007; Troemel et al., 1999; Vanhoven et al., 2006), both MI and e3D were correctly specified (see Table S5A,B in the supplementary material). These results indicate that *ceH-36*, *ngn-1* and *hlh-2* represent components of a novel pathway that establishes a bilateral asymmetry in the *C. elegans* nervous system.

### ***ceH-36* acts cell autonomously to establish a left-right asymmetry**

To identify when and where *ceH-36* functions to generate MI, we performed a mosaic analysis of *ceH-36* similar to our *ngn-1* mosaic analysis. We generated *ceH-36(n5333)* mutant animals carrying an extrachromosomal array containing the *ceH-36* rescuing construct marked with the cell-autonomous *gfp* markers *sur-5::gfp* (Yochem et al., 1998) and *unc-119::gfp* (Maduro and Pilgrim, 1995), and determined in each animal: (1) the fate of ABaraappaaa, i.e. an MI

neuronal fate or an e3D-like fate; and (2) the presence or the absence of the array in the ABaraappaaa cell. Based on these criteria, we classified each animal into one of four categories, as we did in our *ngn-1* mosaic analysis (Fig. 5B). Of 350 animals examined, 28 animals contained ABaraappaaa transformed into an e3D-like cell. All of these 28 animals were classified as Class IV; no animals were categorized as Class III. The remaining 322 animals contained an ABaraappaaa that differentiated into an MI neuron. Of these animals, 288 animals were classified as Class I, and the remaining 34 animals were categorized as Class II (Fig. 5B). In short, our data support a strong association between the specification of the MI neuron fate and the presence of the array in ABaraappaaa ( $P < 0.001$ ) and indicate that *ceH-36* acts cell-autonomously to generate bilateral asymmetry in the cell lineage.

We further examined the 28 animals of Class IV, in which ABaraappaaa was transformed into an e3D-like cell that had lost the array and determined the cell division at which the array had been mitotically lost. We identified eight animals that had an extra



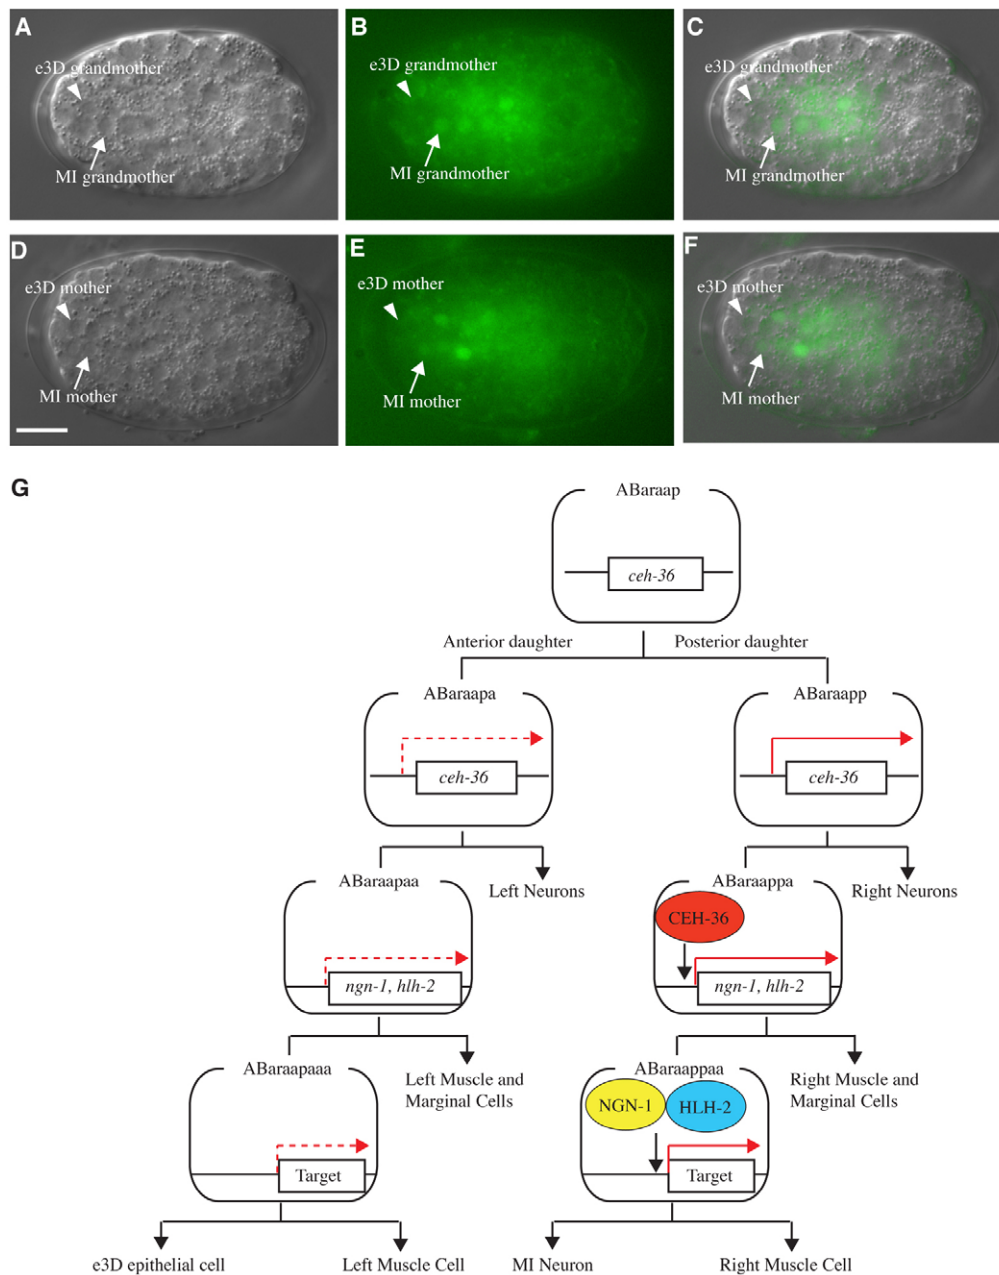

**Fig. 6. Expression of *ceh-36* is left-right asymmetric.** (A-C) Expression of *ceh-36* at the stage of the MI grandmother cell. (A) Nomarski image of an embryo carrying *ceh-36::gfp*. (B) Fluorescence image of the same embryo. (C) Merged image of A and B. The arrows indicate the MI grandmother cell, ABaraappa; the arrowheads indicate the e3D grandmother cell, ABaraapaa. (D-F) Expression of *ceh-36* at the stage of the MI mother cell. (D) Nomarski image of an embryo carrying *ceh-36::gfp*. (E) Fluorescence image of the same embryo. (F) Merged image of D and E. The arrows indicate the MI mother cell, ABaraappa; the arrowheads indicate the e3D mother cell, ABaraapaaa. Anterior is towards the left; ventral is towards the top. Scale bar: 5  $\mu$ m. (G) A model for the establishment of the left-right asymmetric cell lineage. The solid and dotted arrows in red indicate the presence and absence of transcriptional induction, respectively. 'Target' represents a locus induced by a heterodimer of NGN-1 and HLH-2.

e3D-like cell and had lost the array at the cell division of ABaraap (Fig. 5C). By contrast, we identified no animals that had lost the array at the next cell division, that of the MI great grandmother cell, ABaraapp (Fig. 5C). Together, these findings indicate that the presence of the *ceh-36* wild-type gene in the MI great grandmother cell is both necessary and sufficient to rescue the MI transformation defect of *ceh-36(n5333)*.

### Left-right asymmetric expression of *ngn-1* and *hlh-2* is abolished in *ceh-36* mutants

Our mosaic analyses suggest that the site of *ceh-36* action is one cell division earlier than that of *ngn-1* action: our *ceh-36* mosaic analysis indicates that the presence of the *ceh-36* wild-type gene in the MI great grandmother cell (ABaraapp) is both necessary and sufficient to generate MI, while our *ngn-1* mosaic analysis indicates that the presence of the *ngn-1* wild-type gene in the MI grandmother cell (ABaraappa) is both necessary and sufficient to generate MI (Fig.

5D). Because these observations suggest that *ceh-36* acts upstream of or in parallel to *ngn-1*, we examined expression of *ngn-1* in *ceh-36(n5333)* mutant embryos. We observed developing *ceh-36(n5333)* mutant embryos carrying *ngn-1::gfp* and found that NGN-1::GFP was not detectable in the MI mother cell (Fig. 4D-F). We also asked whether expression of *hlh-2* in the MI mother cell requires *ceh-36*. We observed developing *ceh-36(n5333)* mutant embryos carrying *hlh-2::gfp* and found that HLH-2::GFP was not detectable in the MI mother cell (Fig. 4J-L). These observations indicate that establishment of left-right asymmetric expression of *ngn-1* and *hlh-2* requires *ceh-36* and that *ceh-36* acts upstream of *ngn-1* and *hlh-2* to establish left-right asymmetry in the cell lineage.

### Expression of *ceh-36* is left-right asymmetric

To identify when and where *ceh-36* is expressed during embryogenesis, we generated a translational *ceh-36::gfp* fusion gene by an in-frame insertion of a *gfp*-coding sequence into the 3'

end of the *ceh-36*-coding sequence flanked by the 2.5 kb 5' upstream and 1.1 kb 3' downstream genomic sequence. We integrated this *ceh-36::gfp* transgene into the *C. elegans* genome and found that the *ceh-36::gfp* transgene rescued the MI transformation of *ceh-36(n5333)* mutants (see Table S4 in the supplementary material), indicating that this *ceh-36::gfp* is functional. We observed developing wild-type embryos carrying the *ceh-36::gfp* transgene and found that CEH-36::GFP was present in the MI grandmother cell but not in the e3D grandmother cell (Fig. 6A-C). CEH-36::GFP in the MI grandmother cell became detectable 25 minutes after this cell was generated. We also found that CEH-36::GFP was present in the MI mother cell but not in the e3D mother cell (Fig. 6D-F). These results indicate that the *ceh-36/ngn-1/hlh-2* transcriptional cascade acts specifically on the right of the cell lineage but not on the left to generate MI and establish left-right asymmetry in this cell lineage.

## DISCUSSION

Bilateral asymmetry is a conserved and fundamental feature of nervous systems. Despite its importance, the molecular and cellular mechanisms that establish neuroanatomical asymmetry have been largely elusive. Although Otx homeodomain proteins and proneural bHLH transcription factors have been shown to promote neurogenesis, they have not previously been shown to establish bilateral asymmetry. In this study, we show that two proneural bHLH genes, *ngn-1* and *hlh-2*, and the Otx homeodomain gene *ceh-36* are required to generate the single left-right unpaired MI motoneuron. Our results indicate that CEH-36 proteins are present in the MI grandmother cell but not in the e3D grandmother cell. *ceh-36* is required for the asymmetric expression of *ngn-1* and *hlh-2*. We propose that the asymmetric localization of CEH-36 proteins promotes asymmetric expression of *ngn-1* and *hlh-2* in the MI grandmother cell but not in the e3D grandmother cell. The *ngn-1* and *hlh-2* products generated in the MI grandmother cell are then transmitted to the MI mother cell, leading to the formation of a heterodimer between NGN-1 and HLH-2 in the MI mother cell but not in the e3D mother cell. This asymmetric localization of NGN-1 and HLH-2 then induces an asymmetric neurogenic program, giving rise to the MI neuron on the right side of the cell lineage and the e3D epithelial cell on the left (Fig. 6G).

Our *ceh-36* mosaic analysis indicates that the presence of the *ceh-36* wild-type gene in the MI great grandmother cell (ABaraapp) is necessary and sufficient to generate an MI neuron. This observation suggests that transcription of *ceh-36* initiates in this cell (Fig. 6G). Our expression analysis of *ceh-36* supports this notion: we observed a CEH-36::GFP functional protein localized to the nucleus of the MI grandmother cell 25 minutes after its generation. Because fluorophore formation of the variant of GFP we used requires at least 30 minutes (Heim et al., 1995), and because the MI great grandmother cell divides about 30 minutes after its generation to give rise to the MI grandmother cell, it is highly likely that transcription of *ceh-36* indeed initiates in the MI great grandmother cell. By contrast, our expression analysis of *ceh-36* indicates that CEH-36::GFP was not detectable in the e3D grandmother cell. This observation suggests that *ceh-36* is not transcribed in the e3D great grandmother cell, ABaraapa. Although post-transcriptional regulation remains a formal possibility, we suggest that the developmental program establishing the MI-e3D bilateral asymmetry is specified by the asymmetric transcription of *ceh-36* in the MI great grandmother cell, ABaraapp, but not in the e3D great grandmother cell, ABaraapa (Fig. 6G). Thus, the determination of the left-right asymmetry of this cell lineage occurs

at least three cell generations prior to the generation of MI and e3D within the two sister cells, ABaraapa and ABaraapp, that first separate the left and right branches of cell lineage. We suggest that this initial apparently cryptic asymmetry between ABaraapa and ABaraapp is transduced to the post-mitotic MI neuron by a CEH-36/NGN-1/HLH-2 transcriptional cascade that acts through multiple rounds of cell division on the right side.

Our results indicate that mutations in genes required to establish the non-anatomical bilateral asymmetries of the AWC and ASE neurons do not affect the MI-e3D anatomical asymmetry. Thus, the *ceh-36/ngn-1/hlh-2* transcriptional cascade is a novel pathway involved in establishing bilateral asymmetry in the *C. elegans* nervous system. The AWC bilateral asymmetry is established after the generation of the two post-mitotic AWC neurons through an interaction between these cells (e.g. Chuang et al., 2007). Likewise, the ASE bilateral asymmetry is established by a regulatory pathway that acts within the two post-mitotic ASE neurons (Johnston et al., 2005). By contrast, our results indicate that *ceh-36* and *ngn-1* act within dividing cells that are progenitors to MI and e3D in order to establish the MI-e3D bilateral asymmetry. Thus, our studies reveal a novel mechanism in which a CEH-36/NGN-1/HLH-2 pathway acts through three rounds of cell division to establish an anatomical bilateral asymmetry manifested by post-mitotic differentiated cells.

Our finding that *ngn-1* and *ceh-36* are required to generate the MI neuron demonstrates that the role of neurogenin and Otx genes in promoting neurogenesis is evolutionarily conserved from *C. elegans* to mammals (Fode et al., 1998; Ma et al., 1998; Omodei et al., 2008). Do these genes in vertebrates also act to establish bilateral asymmetry in the nervous system? The epithalamus of the diencephalon displays anatomical asymmetries in many vertebrate species (Concha and Wilson, 2001). For example, in zebrafish, the habenular nuclei in the dorsal diencephalon display anatomical left-right asymmetry (Concha et al., 2000). It has been shown that the establishment of this left-right difference in the habenular structure requires asymmetry in the timing of neurogenesis (Aizawa et al., 2007) and that the habenula express the zebrafish *ngn1* gene (Mueller and Wullmann, 2003). In addition, the zebrafish *ngn3* gene is asymmetrically expressed in the anterior-ventral diencephalon, with stronger expression on the left side than on the right (Wang et al., 2001). Furthermore, in mammals, *Otx2* is required for the generation of the mesencephalic dopaminergic neurons, in which it promotes expression of *ngn2* in the mesencephalic dopaminergic progenitors (Omodei et al., 2008). It has been shown that *ngn2* is also required for the generation of the mesencephalic dopaminergic neurons, including those located in the retro-rubral area (Andersson et al., 2006), and that the retro-rubral area displays bilateral asymmetry in the number of the dopaminergic neurons (Zaborszky and Vadasz, 2001). Given our results, these observations raise the intriguing possibility that an evolutionarily conserved transcriptional cascade composed of an Otx homeodomain gene and a neurogenin bHLH gene is involved in establishment of nervous system bilateral asymmetry in many animals, including mammals.

## Acknowledgements

We thank Yuji Kohara for *ngn-1* and *hlh-2* cDNA; Michael Krause for the HLH-2 antibody; Andy Fire for expression vectors; the *Caenorhabditis* Genetics Center, which is funded by the NIH National Center for Research Resources (NCRR), for strains; Na An, Beth Castor, Elissa Murphy, Rita Droste, Tove Ljungars and Nikhil Bhatla for technical assistance; and Brendan Galvin and Daniel Denning for critical reading of the manuscript. S.N. was supported in part by an MIT Praecis Presidential Fellowship and a McGovern Institute Schoemaker Graduate Fellowship. H.R.H. is an Investigator of the Howard

Hughes Medical Institute and the David H. Koch Professor of Biology at MIT. This work was supported by the Howard Hughes Medical Institute. Deposited in PMC for release after 6 months.

#### Competing interests statement

The authors declare no competing financial interests.

#### Supplementary material

Supplementary material for this article is available at <http://dev.biologists.org/lookup/suppl/doi:10.1242/dev.058834/-DC1>

#### References

- Aizawa, H., Goto, M., Sato, T. and Okamoto, H. (2007). Temporally regulated asymmetric neurogenesis causes left-right difference in the zebrafish habenular structures. *Dev. Cell* **12**, 87-98.
- Albertson, D. G. and Thomson, J. N. (1976). The pharynx of *Caenorhabditis elegans*. *Philos. Trans. R. Soc. Lond. B Biol. Sci.* **275**, 299-325.
- Andersson, E., Jensen, J. B., Parmar, M., Guillemot, F. and Bjorklund, A. (2006). Development of the mesencephalic dopaminergic neuron system is compromised in the absence of neurogenin 2. *Development* **133**, 507-516.
- Austin, J. and Kimble, J. (1989). Transcript analysis of *gfp-1* and *lin-12*, homologous genes required for cell interactions during development of *C. elegans*. *Cell* **58**, 565-571.
- Avery, L. and Horvitz, H. R. (1987). A cell that dies during wild-type *C. elegans* development can function as a neuron in a *ced-3* mutant. *Cell* **51**, 1071-1078.
- Barth, K. A., Miklosi, A., Watkins, J., Bianco, I. H., Wilson, S. W. and Andrew, R. J. (2005). *fsi* zebrafish show concordant reversal of laterality of viscera, neuroanatomy, and a subset of behavioral responses. *Curr. Biol.* **15**, 844-850.
- Brenner, S. (1974). The genetics of *Caenorhabditis elegans*. *Genetics* **77**, 71-94.
- Chang, S., Johnston, R. J., Jr and Hobert, O. (2003). A transcriptional regulatory cascade that controls left/right asymmetry in chemosensory neurons of *C. elegans*. *Genes Dev.* **17**, 2123-2137.
- Chuang, C. F., Vanhoven, M. K., Fetter, R. D., Verselis, V. K. and Bargmann, C. I. (2007). An innexin-dependent cell network establishes left-right neuronal asymmetry in *C. elegans*. *Cell* **129**, 787-799.
- Concha, M. L. and Wilson, S. W. (2001). Asymmetry in the epithalamus of vertebrates. *J. Anat.* **199**, 63-84.
- Concha, M. L., Burdine, R. D., Russell, C., Schier, A. F. and Wilson, S. W. (2000). A nodal signaling pathway regulates the laterality of neuroanatomical asymmetries in the zebrafish forebrain. *Neuron* **28**, 399-409.
- Fode, C., Gradwohl, G., Morin, X., Dierich, A., LeMeur, M., Goriadis, C. and Guillemot, F. (1998). The bHLH protein NEUROGENIN 2 is a determination factor for epibranchial placode-derived sensory neurons. *Neuron* **20**, 483-494.
- Gaudet, J. and Mango, S. E. (2002). Regulation of organogenesis by the *Caenorhabditis elegans* FoxA protein PHA-4. *Science* **295**, 821-825.
- Grove, C. A., De Masi, F., Barrasa, M. I., Newburger, D. E., Alkema, M. J., Bulyk, M. L. and Walhout, A. J. (2009). A multiparameter network reveals extensive divergence between *C. elegans* bHLH transcription factors. *Cell* **138**, 314-327.
- Heim, R., Cubitt, A. B. and Tsien, R. Y. (1995). Improved green fluorescence. *Nature* **373**, 663-664.
- Hobert, O., Johnston, R. J., Jr and Chang, S. (2002). Left-right asymmetry in the nervous system: the *Caenorhabditis elegans* model. *Nat. Rev. Neurosci.* **3**, 629-640.
- Jansen, G., Hazendonk, E., Thijssen, K. L. and Plasterk, R. H. (1997). Reverse genetics by chemical mutagenesis in *Caenorhabditis elegans*. *Nat. Genet.* **17**, 119-121.
- Jarman, A. P., Grau, Y., Jan, L. Y. and Jan, Y. N. (1993). *atonal* is a proneural gene that directs chordotonal organ formation in the *Drosophila* peripheral nervous system. *Cell* **73**, 1307-1321.
- Johnston, R. J. and Hobert, O. (2003). A microRNA controlling left/right neuronal asymmetry in *Caenorhabditis elegans*. *Nature* **426**, 845-849.
- Johnston, R. J., Jr, Chang, S., Etchberger, J. F., Ortiz, C. O. and Hobert, O. (2005). MicroRNAs acting in a double-negative feedback loop to control a neuronal cell fate decision. *Proc. Natl. Acad. Sci. USA* **102**, 12449-12454.
- Karp, X. and Greenwald, I. (2003). Post-transcriptional regulation of the E/Daughterless ortholog HLH-2, negative feedback, and birth order bias during the AC/VU decision in *C. elegans*. *Genes Dev.* **17**, 3100-3111.
- Kimble, J. and Hirsh, D. (1979). The postembryonic cell lineages of the hermaphrodite and male gonads in *Caenorhabditis elegans*. *Dev. Biol.* **70**, 396-417.
- Koga, M. and Ohshima, Y. (2004). The *C. elegans* *ceh-36* gene encodes a putative homodomain transcription factor involved in chemosensory functions of ASE and AWC neurons. *J. Mol. Biol.* **336**, 579-587.
- Krause, M., Park, M., Zhang, J. M., Yuan, J., Harfe, B., Xu, S. Q., Greenwald, I., Cole, M., Paterson, B. and Fire, A. (1997). A *C. elegans* E/Daughterless bHLH protein marks neuronal but not striated muscle development. *Development* **124**, 2179-2189.
- Lanjuin, A., VanHoven, M. K., Bargmann, C. I., Thompson, J. K. and Sengupta, P. (2003). *Otx/otd* homeobox genes specify distinct sensory neuron identities in *C. elegans*. *Dev. Cell* **5**, 621-633.
- Levin, M. (2005). Left-right asymmetry in embryonic development: a comprehensive review. *Mech. Dev.* **122**, 3-25.
- Liu, L. X., Spoerke, J. M., Mulligan, E. L., Chen, J., Reardon, B., Westlund, B., Sun, L., Abel, K., Armstrong, B., Hardiman, G. et al. (1999). High-throughput isolation of *Caenorhabditis elegans* deletion mutants. *Genome Res.* **9**, 859-867.
- Longo, A., Guanga, G. P. and Rose, R. B. (2008). Crystal structure of E47-NeuroD1/beta2 bHLH domain-DNA complex: heterodimer selectivity and DNA recognition. *Biochemistry* **47**, 218-229.
- Ma, Q., Chen, Z., del Barco, Barrantes, I., de la Pompa, J. L. and Anderson, D. J. (1998). *neurogenin1* is essential for the determination of neuronal precursors for proximal cranial sensory ganglia. *Neuron* **20**, 469-482.
- Maduro, M. and Pilgrim, D. (1995). Identification and cloning of *unc-119*, a gene expressed in the *Caenorhabditis elegans* nervous system. *Genetics* **141**, 977-988.
- Mello, C. C., Kramer, J. M., Stinchcomb, D. and Ambros, V. (1991). Efficient gene transfer in *C. elegans*: extrachromosomal maintenance and integration of transforming sequences. *EMBO J.* **10**, 3959-3970.
- Mueller, T. and Wullmann, M. F. (2003). Anatomy of neurogenesis in the early zebrafish brain. *Dev. Brain Res.* **140**, 137-155.
- Omodei, D., Acampora, D., Mancuso, P., Prakash, N., Di Giovannantonio, L. G., Wurst, W. and Simeone, A. (2008). Anterior-posterior graded response to Otx2 controls proliferation and differentiation of dopaminergic progenitors in the ventral mesencephalon. *Development* **135**, 3459-3470.
- Ortiz, C. O., Etchberger, J. F., Posy, S. L., Frokjaer-Jensen, C., Lockery, S., Honig, B. and Hobert, O. (2006). Searching for neuronal left/right asymmetry: genome-wide analysis of nematode receptor-type guanylyl cyclases. *Genetics* **173**, 131-149.
- Pascual, A., Huang, K. L., Neveu, J. and Preat, T. (2004). Neuroanatomy: brain asymmetry and long-term memory. *Nature* **427**, 605-606.
- Pierce-Shimomura, J. T., Faumont, S., Gaston, M. R., Pearson, B. J. and Lockery, S. R. (2001). The homeobox gene *lim-6* is required for distinct chemosensory representations in *C. elegans*. *Nature* **410**, 694-698.
- Poulin, G., Turgeon, B. and Drouin, J. (1997). NeuroD1/beta2 contributes to cell-specific transcription of the proopiomelanocortin gene. *Mol. Cell. Biol.* **17**, 6673-6682.
- Shiratori, H. and Hamada, H. (2006). The left-right axis in the mouse: from origin to morphology. *Development* **133**, 2095-2104.
- Sulston, J. E. and Horvitz, H. R. (1977). Post-embryonic cell lineages of the nematode, *Caenorhabditis elegans*. *Dev. Biol.* **56**, 110-156.
- Sulston, J. E., Schierenberg, E., White, J. G. and Thomson, J. N. (1983). The embryonic cell lineage of the nematode *Caenorhabditis elegans*. *Dev. Biol.* **100**, 64-119.
- Toqa, A. W. and Thompson, P. M. (2003). Mapping brain asymmetry. *Nat. Rev. Neurosci.* **4**, 37-48.
- Troemel, E. R., Sagasti, A. and Bargmann, C. I. (1999). Lateral signaling mediated by axon contact and calcium entry regulates asymmetric odorant receptor expression in *C. elegans*. *Cell* **99**, 387-398.
- Vanhoven, M. K., Bauer Huang, S. L., Albin, S. D. and Bargmann, C. I. (2006). The claudin superfamily protein NSY-4 biases lateral signaling to generate left-right asymmetry in *C. elegans* olfactory neurons. *Neuron* **51**, 291-302.
- Wang, X., Chu, L. T., He, J., Emelyanov, A., Korzh, V. and Gong, Z. (2001). A novel zebrafish bHLH gene, *neurogenin3*, is expressed in the hypothalamus. *Gene* **275**, 47-55.
- Wes, P. D. and Bargmann, C. I. (2001). *C. elegans* odour discrimination requires asymmetric diversity in olfactory neurons. *Nature* **410**, 698-701.
- Yochem, J., Weston, K. and Greenwald, I. (1988). The *Caenorhabditis elegans* *lin-12* gene encodes a transmembrane protein with overall similarity to *Drosophila* Notch. *Nature* **335**, 547-550.
- Yochem, J., Gu, T. and Han, M. (1998). A new marker for mosaic analysis in *Caenorhabditis elegans* indicates a fusion between *hyp6* and *hyp7*, two major components of the hypodermis. *Genetics* **149**, 1323-1334.
- Yu, S., Avery, L., Baude, E. and Garbers, D. L. (1997). Guanylyl cyclase expression in specific sensory neurons: a new family of chemosensory receptors. *Proc. Natl. Acad. Sci. USA* **94**, 3384-3387.
- Zaborszky, L. and Vadasz, C. (2001). The midbrain dopaminergic system: anatomy and genetic variation in dopamine neuron number of inbred mouse strains. *Behav. Genet.* **31**, 47-59.
